# Supplementary material for: One-step packing of anti-voltage photonic crystals into microfluidic channels for ultra-fast separation of amino acids and peptides
Source: Royal Society of Chemistry journal article supplement (doi:10.1039/c2lc40720e), 2012-11-29
Supplement: c2lc40720e.pdf [file c2lc40720e.pdf]

## Supplementary information

### One-step packing of anti-voltage photonic crystals into microfluidic channels for ultra-fast separation of amino acids and peptides

Tao Liao,<sup>†</sup> Zhengpeng Guo,<sup>†</sup> Jincheng Li,<sup>†</sup> Meirong Liu,<sup>†</sup> Yi Chen<sup>†,‡</sup>

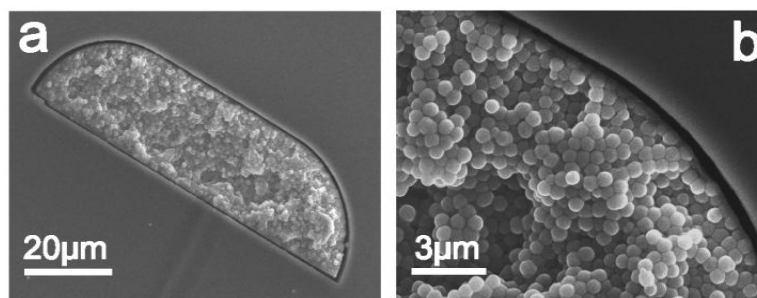

**Fig. S1** Low (a) and high (b) resolution SEM image of the cross section of a PC column assembled from bare silica particles with a diameter of 0.5 μm after cutting the glass chip and drying the PC by natural vaporization.

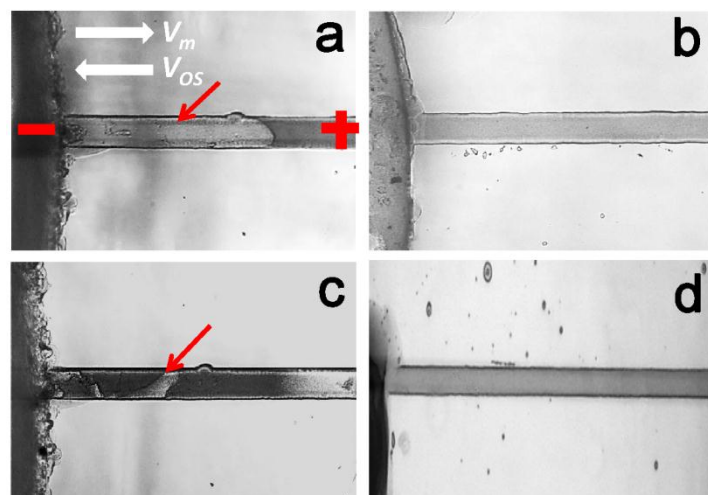

**Fig. S2** The stability of three PC-packed columns against an electric field with negative polar connected to the left reservoirs. (a) the unfixed PC column at 100 V/cm, (b) the fixed end of the one-end-fixed PC column at 1000V/cm, (c) the unfixed end of the one-end-fixed PC column at 100V/cm and (d) the wholly fixed PC column at 2000V/cm. The red arrows indicate the cracks of PCs due to electric migration ( $v_m$ ) and electroosmotic ( $v_{os}$ ) pumping effect.

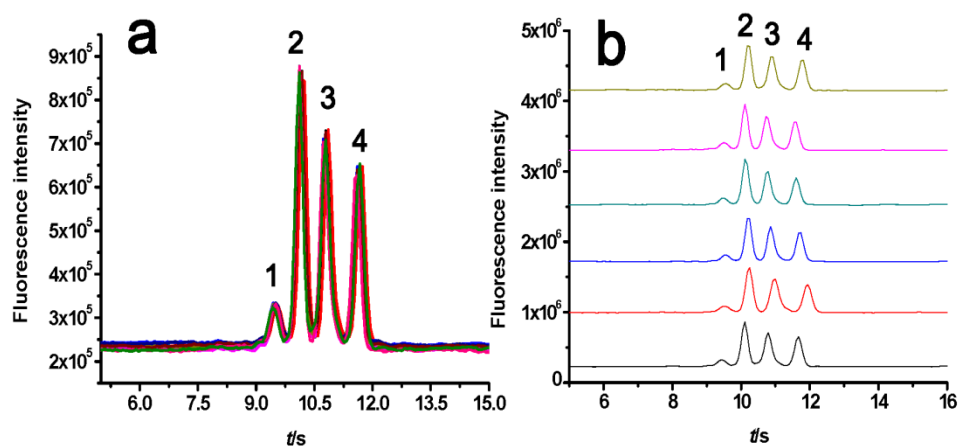

**Fig. S3** Reproducibility of packed PCs checked by separation of FITC and three FITC-labeled peptides using a running buffer of 20mM  $\text{Na}_2\text{B}_4\text{O}_7$  at pH 10.02. (a) Ten consecutive injections, and (b) measured from six individual packed PCs. Peak identity: 1= FITC, 2=  $G_6$ , 3= $G_5$ , 4= $G_4$ .
